# Supplementary material
Source: publisher figshare collection journal article supplement (https://gsapubs.figshare.com/ndownloader/files/34835937)
Supplement: Supplementary file 1 [file 34835937]

## Sheet: Sheet1
Depth (cm)	Age (ya)	Fe Flux (g/cm2kyr)
10.5	4015.23	0.111723
12	4263.26	0.174859
20.5	5668.77	0.222268
24	6247.52	0.292711
28.5	6991.61	0.350301
34	7901.06	0.514607
42	9223.9	0.310123
50.5	10629.4	0.4145
52	10877.5	0.348897
56	11538.9	0.262645
60.5	12283	0.270252
62	12531	0.22861
70.5	13203	0.163396
85.5	14388.9	0.312082
95.5	15179.6	0.296524
105.5	15970.2	0.182713
780	75030	0.233167
786	75210	0.20396
790	75333.3	0.227363
796	75533.3	0.200911
802	75700	0.19632
808	76075	0.152156
810	76225	0.133284
812	76400	0.141151
818	76900	0.188349
828	77750	0.155063
838	78577.8	0.237874
848	79400	0.257048
854	79900	0.293402
858	80056.5	0.681638
862	80213	0.233802
868	80447.8	0.175225
878	80866.7	0.20126
890	81588.2	0.199207
924	84550	0.0873497
939.5	86400	0.133253
951.5	87900	0.115114
961.5	89000	0.109532
971.5	90300	0.249317
981.5	91500	0.31418
991.5	92500	0.440598
1001.5	93700	0.593907
1011.5	95066.7	0.127756
1021.5	96500	0.134685
1031.5	97800	0.100048
1041.5	98995	0.140743
1051.5	100300	0.16265
1061.5	101842	0.0970148
1071.5	103455	0.135391
1080.5	105056	0.110282
1100.5	108150	0.11023
1105.5	108925	0.16957
1110.5	109917	0.144386
1115.5	110725	0.14207
1120.5	111638	0.195512
1125.5	112525	0.0781005
1130.5	113412	0.110469
1135.5	114050	0.132552
1140.5	114775	0.110203
1145.5	115388	0.100048
1150.5	116075	0.102042
1155.5	116720	0.135577
1160.5	117320	0.114739
1165.5	117925	0.146932
1166.5	118075	0.121885
1170.5	118675	0.161939
1175.5	119250	0.10616
1180.5	119917	0.102415
1185.5	120625	0.122005
1190.5	121375	0.129145
1195.5	122150	0.125409
1200.5	122850	0.0951171
1205.5	123450	0.170625
1210.5	124075	0.211206
1215.5	124592	0.299349
1220.5	125050	3.59492
1225.5	125462	0.360805
1230.5	125850	0.338927
1239.5	126675	0.410301
1243	126950	0.271777
1249	127400	0.354469
1253	127700	0.367116
1259	128400	0.463811
1263	128800	0.644875
1269	129433	3.43029
1273	129967	4.78074
1279	130689	0.192052
1283	131178	0.50808
1285	131510	0.236919
1289	132350	0.352864
1293	133190	0.234709
1295	133662	0.198979
1299	134712	0.210338

## Sheet: G49956
Zhou, Y., and McManus, J., 2022, Extensive evidence for a last interglacial Laurentide outburst (LILO) event: Geology, v. 50, https://doi.org/10.1130/G49956.1
